# Supplementary material
Source: publisher figshare collection journal article supplement (https://tandf.figshare.com/ndownloader/files/36011602)
Supplement: Supplementary file 1 [file 36011602]

## Sheet: table3
Table S4：The lncRNA transcripts differentially expressed during muscle development
Transcript_id	Gene_id	Feature_id	NoADBJ_FPKM	ADBJ_FPKM	Log2(foldchange)	Pvalue	Qvalue
LNC_000102	XLOC_000890	transcript	0.920807	3.64753	-1.98595	2.47489e-05	0.0316449
LNC_000361	XLOC_003427	transcript	1.91338	29.0489	-3.92429	0.0234578	0.139625
LNC_000508	XLOC_004550	transcript	4.67439	4.42661	0.0785752	0.000461195	0.0571701
LNC_000538	XLOC_004679	transcript	0	2.97644	#NAME?	0.00704666	0.0943303
LNC_000586	XLOC_004991	transcript	2.28828	0.555435	2.04257	0.010618	0.106749
LNC_000627	XLOC_005286	transcript	2.59121	8.90835	-1.78153	0.0139871	0.11697
LNC_000668	XLOC_005763	transcript	1.36737	4.08479	-1.57886	0.00297648	0.075431
LNC_000810	XLOC_006805	transcript	1.60639	0.533701	1.58972	0.0399545	0.173713
LNC_001108	XLOC_009130	transcript	0.127684	3.15298	-4.62607	3.6524e-05	0.0331125
LNC_001122	XLOC_009318	transcript	12.1527	2.70377	2.16823	0.00334111	0.077418
LNC_001125	XLOC_009353	transcript	18.392	2.53163	2.86094	0.0038686	0.0816996
LNC_001450	XLOC_012607	transcript	0.218737	2.05496	-3.23184	0.0186593	0.129519
LNC_001677	XLOC_014188	transcript	2.29518	7.41511	-1.69186	0.00113454	0.0642308
LNC_002771	XLOC_022293	transcript	5.03627	0.91626	2.45853	0.0140126	0.11697
LNC_002890	XLOC_023202	transcript	0.431568	5.41595	-3.64955	0.00249269	0.0723527
LNC_003296	XLOC_026887	transcript	2.38219	5.21514	-1.13042	0.0121099	0.111393
LNC_003551	XLOC_028499	transcript	0.49069	3.83245	-2.96538	0.0165923	0.124521
LNC_003552	XLOC_028499	transcript	0.833447	3.95002	-2.2447	0.00080053	0.0620366
LNC_003834	XLOC_030357	transcript	2.19978	6.08292	-1.4674	0.00663423	0.0920956
LNC_004339	XLOC_033802	transcript	0.578159	2.59896	-2.1684	0.00516787	0.0874642
LNC_004393	XLOC_034237	transcript	11.1503	2.10516	2.40508	0.00585275	0.0893002
LNC_004539	XLOC_035429	transcript	20.042	14.0788	0.509499	0.040224	0.174238
LNC_004566	XLOC_035755	transcript	60.8827	6.78041	3.16659	0.0157966	0.123091
LNC_004567	XLOC_035755	transcript	66.2392	4.49782	3.88039	0.0274021	0.1504
LNC_005165	XLOC_039324	transcript	6.15193	1.93124	1.67151	0.0499378	0.191383
LNC_005428	XLOC_041057	transcript	2.98548	11.9085	-1.99596	0.0242511	0.142036
LNC_005500	XLOC_041594	transcript	0.640919	2.79289	-2.12354	0.0331927	0.160959
LNC_005549	XLOC_041853	transcript	0.856576	2.40023	-1.48652	0.0499153	0.191349
